# Supplementary material for: A high-performance sodium anode composed of few-layer MoSe2 and N, P doped reduced graphene oxide composites
Source: Royal Society of Chemistry journal article supplement (doi:10.1039/c8qi00331a), 2018-01-01
Supplement: c8qi00331a1.pdf [file c8qi00331a1.pdf]

## Electronically Supplementary Information (ESI)

### **High-performance Sodium Anode Comprised of Few-Layer of MoSe<sub>2</sub> and N, P Doped Reduced Graphene Oxide Composites**

Amlan Roy, Arnab Ghosh, Ajit Kumar and Sagar Mitra\*

Electrochemical Energy Laboratory, Department of Energy Science and Engineering,

Indian Institute of Technology Bombay, Powai, Mumbai 400076, India

#### **AUTHOR FOOTNOTE**

Telephone: +91-222576-7849; email: [sagar.mitra@iitb.ac.in](mailto:sagar.mitra@iitb.ac.in)

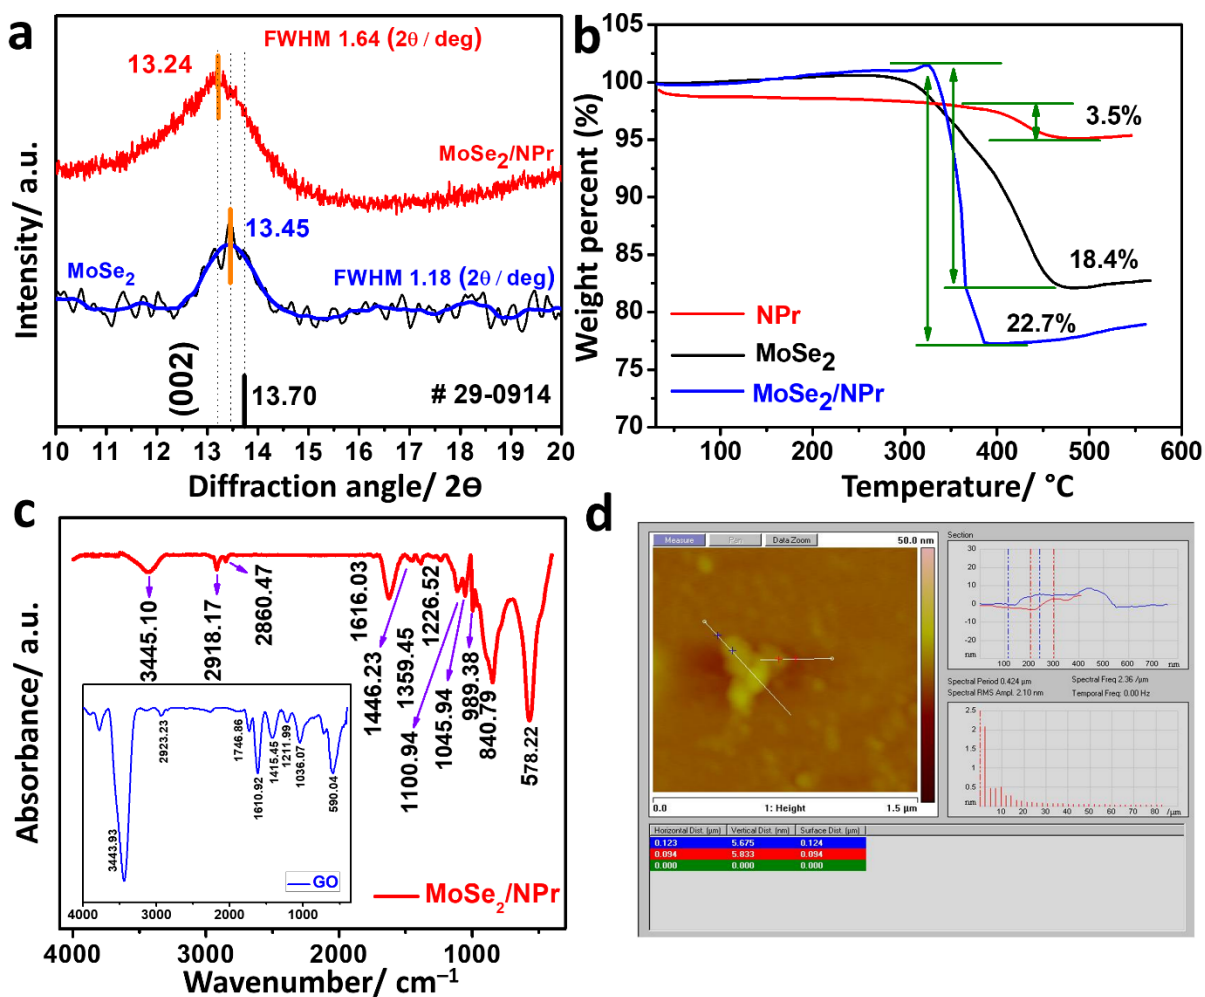

**Figure S1.** (a) Low angle XRD of MoSe<sub>2</sub> and MoSe<sub>2</sub>/NPr, (b) TGA Curve of NPr, MoSe<sub>2</sub> and MoSe<sub>2</sub>/NPr composite at a temperature ramp of 10 °C.min<sup>-1</sup> in air. (c) FTIR Spectra of MoSe<sub>2</sub>/NPr composite (inset: FTIR of GO sheets), (d) AMF image of Bulk MoSe<sub>2</sub>

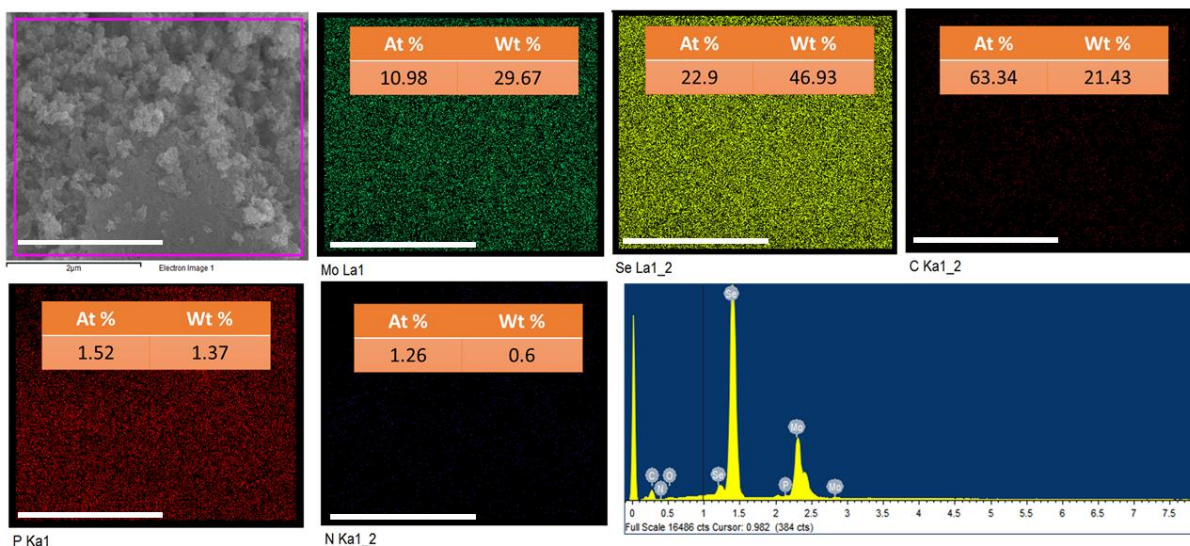

**Figure S2:** EDX Mapping of Mo, Se, C, P and N in MoSe<sub>2</sub>/NPr composite (scale bar: 2µm)

**Table S1:** XPS analysis of NPr, MoSe<sub>2</sub> and MoSe<sub>2</sub>/NPr

| Composite              | Atomic %<br>C (1s) | Atomic %<br>N (1s) | Atomic %<br>P (2p) | Atomic %<br>O (1s) | Atomic %<br>Mo (3d) | Atomic %<br>Se (3d) |
|------------------------|--------------------|--------------------|--------------------|--------------------|---------------------|---------------------|
| MoSe <sub>2</sub>      | -                  | -                  | -                  | -                  | 33.28               | 66.72               |
| MoSe <sub>2</sub> /NPr | 50.97              | 1.07               | 2.85               | 8.25               | 12.54               | 24.32               |

**Table S2:** FTIR of GO sheets <sup>1</sup>:

| Characteristic Bonds        | Wavenumber (cm <sup>-1</sup> ) |
|-----------------------------|--------------------------------|
| O-H vibration               | 3443.9                         |
| Symmetric -CH <sub>2</sub>  | 2923.2                         |
| Asymmetric -CH <sub>2</sub> | 2860.47                        |
| -C=O stretching             | 1610.9                         |
| -C=C stretching             | 1415.4                         |
| Asymmetric C-O-C vibration  | 1211.9                         |
| Symmetric C-O-C vibration   | 1036                           |

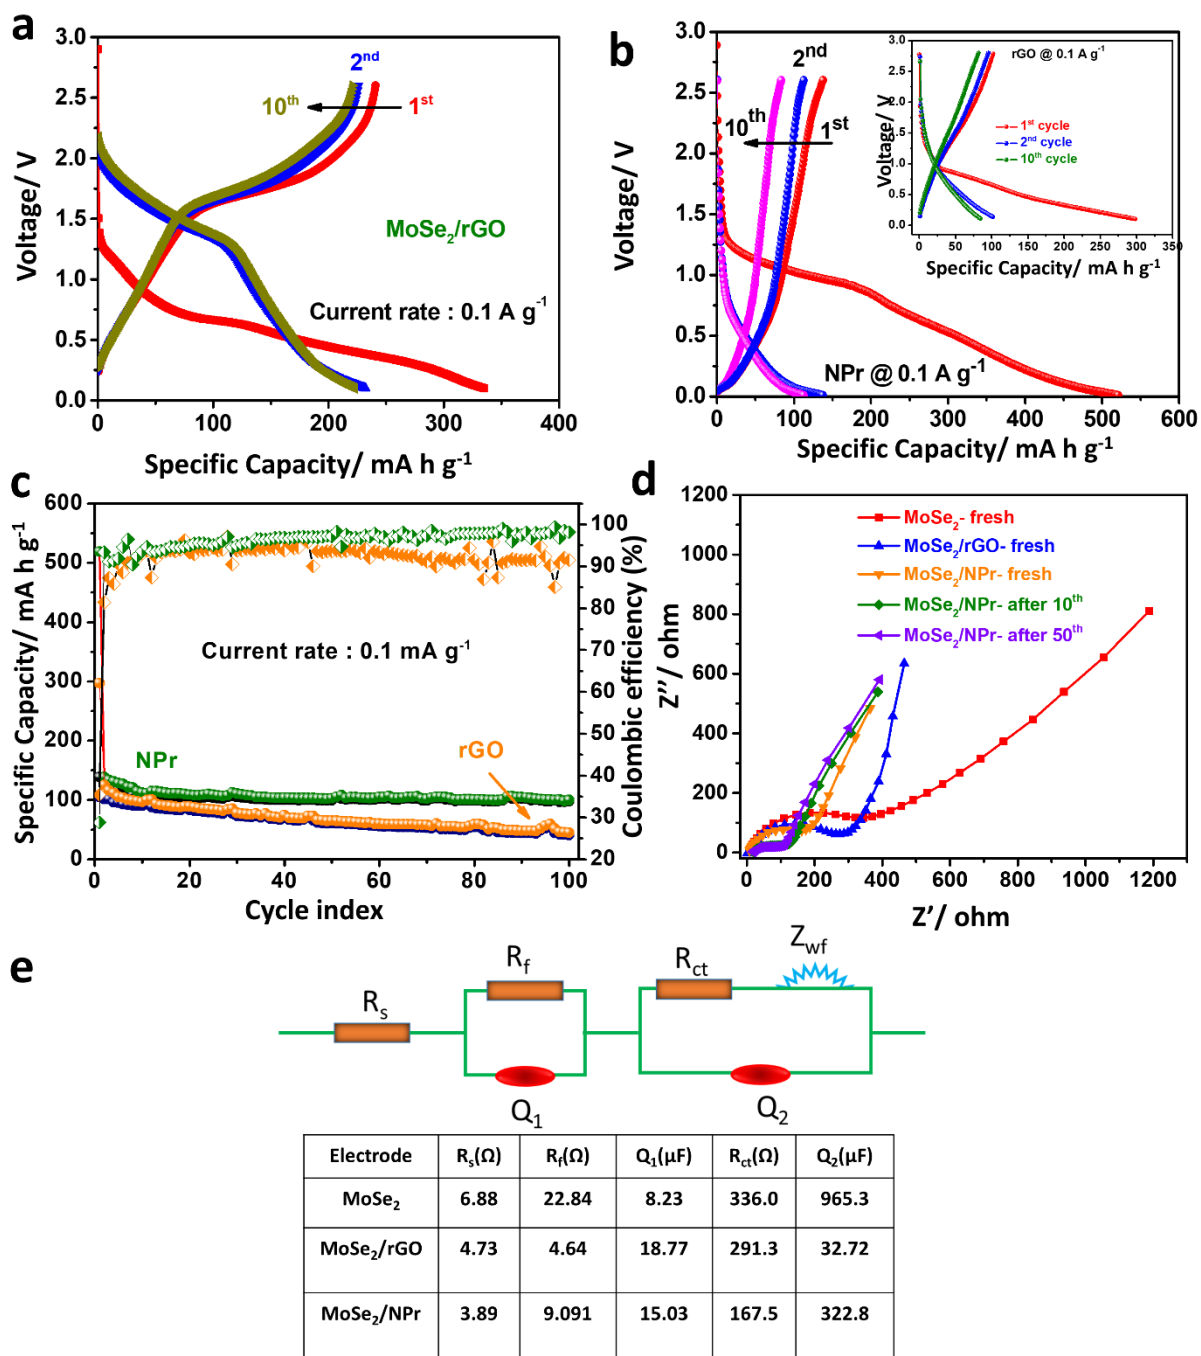

**Figure S3:** (a) Charge-discharge curve of MoSe<sub>2</sub>/rGO composite at a current density of 0.1 A g<sup>-1</sup> (b) Charge-discharge curve of NPr sheets at 0.1 A g<sup>-1</sup> current rate (inset same plot for rGO sheets) (c) cyclic stability of rGO and NPr sheets at 0.1 A g<sup>-1</sup> up-to 100 cycles (d) Nyquist plots of the MoSe<sub>2</sub>, MoSe<sub>2</sub>/rGO and MoSe<sub>2</sub>/NPr electrodes at OCV as well as cycled electrode of MoSe<sub>2</sub>/NPr. (e) Equivalent circuit model of the studied system.

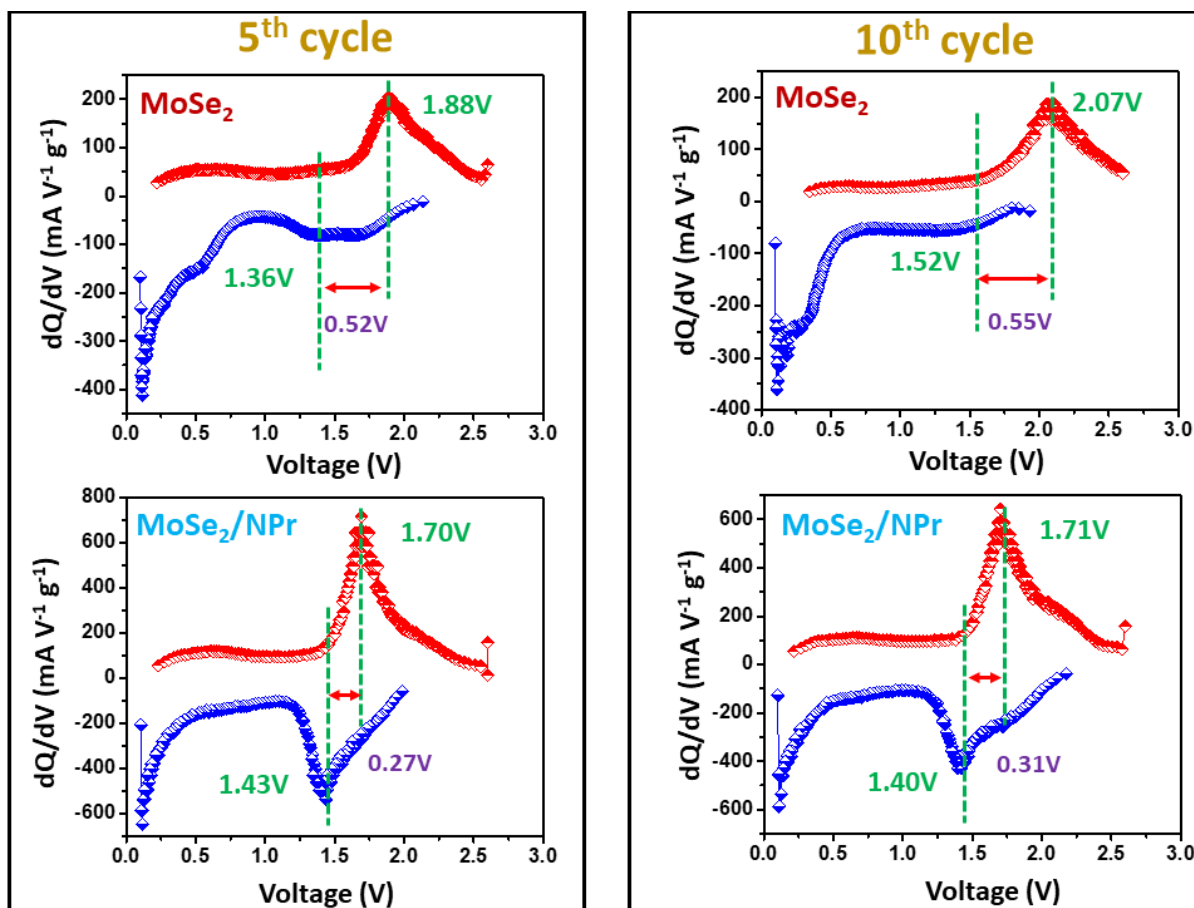

**Figure S4:**  $dQ/dV$  vs Voltage plot (Voltage hysteresis) of  $\text{MoSe}_2$  (a,b) and  $\text{MoSe}_2/\text{NPr}$  (c,d) electrode after 5<sup>th</sup> and 10<sup>th</sup> cycle.

## REFERENCES

- (1) N. Hu, Z. Yang, Y. Wang, L. Zhang, Y. Wang, X. Huang, H. Wei, L. Wei and Y. Zhang, *Nanotechnology*, 2014, **25** (2), 025502.
